# Supplementary material
Source: PubMed Central journal article supplement (PMC6232850)
Supplement: NIHMS1509228-supplement-2.pdf [file NIHMS1509228-supplement-2.pdf]

**Table S1 related to STAR Methods section: Isocaloric diet composition (Research Diets Inc.)**

| Diet Formulas               | Inulin containing diet (ICD) |             | Cellulose containing diet (CCD) |             | FOS containing diet (FCD) |             | Pectin containing diet (PCD) |             | High-fat diet-inulin (HFD-I) |             | High-fat diet-cellulose (HFD-C) |             |
|-----------------------------|------------------------------|-------------|---------------------------------|-------------|---------------------------|-------------|------------------------------|-------------|------------------------------|-------------|---------------------------------|-------------|
| Product #                   | D12081401                    |             | D12081402                       |             | D12081407                 |             | D12081403                    |             | D12081406                    |             | D09072902                       |             |
|                             | gm%                          | kcal%       | gm%                             | kcal%       | gm %                      | kcal %      | gm %                         | kcal%       | gm%                          | kcal%       | gm %                            | kcal%       |
| <b>Protein</b>              | 19                           | 20          | 18.5                            | 20          | 19                        | 20          | 19                           | 20          | 26                           | 20          | 25                              | 20          |
| <b>Carbohydrate</b>         | 67.8                         | 65          | 61.8                            | 65          | 60.8                      | 63          | 63.4                         | 65          | 26                           | 20          | 25                              | 20          |
| <b>Fat</b>                  | 6.5                          | 15          | 6.4                             | 15          | 6.5                       | 15          | 6.5                          | 15          | 34                           | 60          | 33                              | 60          |
| <b>Total</b>                |                              | 100         |                                 | 100         |                           | 100         |                              | 100         |                              | 100         |                                 | 100         |
| <b>Kcal/gm</b>              | 3.88                         |             | 3.78                            |             | 3.88                      |             | 3.88                         |             | 5.1                          |             | 4.9                             |             |
| <b>Ingredient</b>           | <b>g</b>                     | <b>Kcal</b> | <b>g</b>                        | <b>kcal</b> | <b>g</b>                  | <b>kcal</b> | <b>g</b>                     | <b>kcal</b> | <b>g</b>                     | <b>kcal</b> | <b>g</b>                        | <b>kcal</b> |
| Casein, 30 Mesh             | 200                          | 800         | 200                             | 800         | 200                       | 800         | 200                          | 800         | 200                          | 800         | 200                             | 800         |
| L-cysteine                  | 3                            | 12          | 3                               | 12          | 3                         | 12          | 3                            | 12          | 3                            | 12          | 3                               | 12          |
| Corn starch                 | 381                          | 1524        | 409                             | 1636        | 381                       | 1524        | 381                          | 1524        | 0                            | 0           | 0                               | 0           |
| Maltodextrin 10             | 110                          | 440         | 110                             | 440         | 110                       | 440         | 110                          | 440         | 97                           | 388         | 125                             | 500         |
| Sucrose                     | 150                          | 600         | 150                             | 600         | 150                       | 600         | 150                          | 600         | 68.8                         | 275         | 68.8                            | 275         |
| Cellulose, BW200            | 25                           | 0           | 100                             | 0           | 25                        | 0           | 25                           | 0           | 25                           | 0           | 100                             | 0           |
| Inulin (Orafti® HP)         | 75                           | 113         | 0                               | 0           | 0                         | 0           | 0                            | 0           | 75                           | 113         | 0                               | 0           |
| Pectin (Citrus peel, Sigma) | 0                            | 0           | 0                               | 0           | 0                         | 0           | 75                           | 112.5       | 0                            | 0           | 0                               | 0           |
| FOS, P95                    | 0                            | 0           | 0                               | 0           | 75                        | 113         | 0                            | 0           | 0                            | 0           | 0                               | 0           |
| Soybean oil                 | 70                           | 630         | 70                              | 630         | 70                        | 630         | 70                           | 630         | 25                           | 225         | 25                              | 225         |
| Lard                        | 0                            | 0           | 0                               | 0           | 0                         | 0           | 0                            | 0           | 245                          | 2205        | 245                             | 2205        |
| Mineral Mix S10026          | 10                           | 0           | 10                              | 0           | 10                        | 0           | 10                           | 0           | 10                           | 0           | 10                              | 0           |
| DiCalcium PO <sub>4</sub>   | 13                           | 0           | 13                              | 0           | 13                        | 0           | 13                           | 0           | 13                           | 0           | 13                              | 0           |
| Calcium Carbonate           | 5.5                          | 0           | 5.5                             | 0           | 5.5                       | 0           | 5.5                          | 0           | 5.5                          | 0           | 5.5                             | 0           |
| Potassium Citrate           | 16.5                         | 0           | 16.5                            | 0           | 16.5                      | 0           | 16.5                         | 0           | 16.5                         | 0           | 16.5                            | 0           |
| Vitamin Mix V10001          | 10                           | 40          | 10                              | 40          | 10                        | 40          | 10                           | 40          | 10                           | 40          | 10                              | 40          |
| Choline Bitartrate          | 2                            | 0           | 2                               | 0           | 2                         | 0           | 2                            | 0           | 2                            | 0           | 2                               | 0           |
| FD&C Red dye #40            | 0.05                         | 0           | 0                               | 0           | 0                         | 0           | 0.025                        | 0           | 0.05                         | 0           | 0.025                           | 0           |
| FD&C Blue dye #1            | 0                            | 0           | 0.05                            | 0           | 0.025                     | 0           | 0.025                        | 0           | 0                            | 0           | 0                               | 0           |
| FD&C Yellow dye#5           | 0                            | 0           | 0                               | 0           | 0.025                     | 0           | 0                            | 0           | 0                            | 0           | 0.025                           | 0           |

FOS: Fructooligosaccharides

**Table S2 related to Figure 1: Hematology profile after 24 weeks on inulin diet (Males: n=8)**

| <b>Parameters</b>                                        | <b>WT+ Inu</b>   | <b>T5KO+ Inu-NB</b> | <b>T5KO+ Inu-HB</b> |
|----------------------------------------------------------|------------------|---------------------|---------------------|
| <b>White blood cells (<math>10^3/\mu\text{L}</math>)</b> | 8.41 $\pm$ 1.32  | 9.88 $\pm$ 0.54     | 15.02 $\pm$ 1.0*    |
| <b>Neutrophils (<math>10^3/\mu\text{L}</math>)</b>       | 1.86 $\pm$ 0.15  | 2.36 $\pm$ 0.15     | 4.08 $\pm$ 0.15*    |
| <b>Lymphocytes (<math>10^3/\mu\text{L}</math>)</b>       | 6.18 $\pm$ 0.8   | 7.3 $\pm$ 0.41      | 10.55 $\pm$ 0.95*   |
| <b>Monocytes (<math>10^3/\mu\text{L}</math>)</b>         | 0.138 $\pm$ 0.5  | 0.17 $\pm$ 0.02     | 0.3 $\pm$ 0.05      |
| <b>Eosinophils (<math>10^3/\mu\text{L}</math>)</b>       | 0.00             | 0.04 $\pm$ 0.02     | 0.07 $\pm$ 0.03     |
| <b>RBC (M/<math>\mu\text{L}</math>)</b>                  | 11.06 $\pm$ 0.37 | 10.21 $\pm$ 0.11    | 9.68 $\pm$ 0.13     |
| <b>Hb (g/dL)</b>                                         | 15.01 $\pm$ 0.4  | 14.10 $\pm$ 0.14    | 14.44 $\pm$ 0.22    |

\* P<0.05

**Table S3 related to STAR Methods section: List of primers**

| S. No. | Description                    | Forward (5'----3')             | Reverse (5'----3')         |
|--------|--------------------------------|--------------------------------|----------------------------|
| 1      | <i>Nlrc4</i>                   | CGGCCTGCAACCTCTTTCTT           | TGGGCCAAAACATTCAGGTCT      |
| 2      | <i>Nlrp3</i>                   | TCCACAATTCTGACCCACAA           | ACCTCACAGAGGGTCACCAC       |
| 3      | <i>Tlr2</i>                    | AAGATGCGCTTCCTGAATTTG          | TCCAGCGTCTGAGGAATGC        |
| 4      | <i>Tlr4</i>                    | TGTTCTTCTCCTGCCTGACA           | CATCAGGGACTTTGCTGAGTT      |
| 5      | <i>Mcp-1</i>                   | ATCCCAATGAGTAGGCTGGAGAGC       | CAGAAGTGCTTGAGGTGGTTGTG    |
| 6      | <i>Tnf-<math>\alpha</math></i> | ACTCCAGGCGGTGCCTATGT           | AGTGTGAGGGTCTGGGCCAT       |
| 7      | <i>Il-6</i>                    | ACAACGATGATGCACTT              | CTTGGTCCTTAGCCACT          |
| 8      | <i>Il-17a</i>                  | TCATCCCTCAAAGCTCAGCG           | TTTCCCTCCGCATTGACACA       |
| 9      | <i>Cox2</i>                    | CAAGGGAGTCTGGAACATTG           | ACCCAGGTCTCGCTTATGA        |
| 10     | <i>Lcn2</i>                    | AAGGCAGCTTTACGATGTACAGC        | CTTGACATTGTAGCTGTGTACC     |
| 11     | <i>Kc</i>                      | TTGTGCGAAAAGAAGTGCAG           | TACAAACACAGCCTCCCACA       |
| 12     | <i>Il-1<math>\beta</math></i>  | TTGACGGACCCCAAAGATG            | AGAAGGTGCTCATGTCTCAT       |
| 13     | <i>Timp-1</i>                  | GTGCACAGTGTTCCTGTTT            | TCCGTCCACAAACAGTGAGTGTC    |
| 14     | <i>Timp-2</i>                  | GGATTCCGGGAATGACATCTAT         | CGCCTTCCCTGCAATTAGATA      |
| 15     | <i>Collagen 1</i>              | CCTGGTAAAGATGGTGCC             | CACCAGGTTACCTTTTCGCACC     |
| 16     | <i><math>\alpha</math>Smc</i>  | AGACCACCGCTCTTGTGTGT           | GTCAGGATACCTCGCTTGCT       |
| 17     | <i>Tgfb1</i>                   | CGCCATCTATGAGAAAACC            | GTAACGCCAGGAATTGT          |
| 18     | <i>Mmp-2</i>                   | GATAACCTGGATGCCGTCGTG          | CTTACGCTCTTGAGACTTTGGTTC   |
| 19     | <i>Mmp-9</i>                   | GCCCTGGAACACACGACA             | TTGGAAACTCACACGCCAGAAG     |
| 20     | <i>Gpc3</i>                    | GGTGACGGCATGATGAAAGTGAAG       | TGGTGATCTCGTTGTCCTTCTGAT   |
| 21     | <i>Ykl-40</i>                  | AGGCTTTGCGGTCTGAT              | CCAGCTGGTGAAGTAGCAGA       |
| 22     | <i><math>\alpha</math>SMA</i>  | TGACGCTGAAGTATCCGATAGA         | CGAAGCTCGTTATAGAAAGAGTGG   |
| 23     | <i>Fmo3</i>                    | CACCACTGAAAAGCACGGTA           | GTTTAAAGGCACCAAACCATAG     |
| 24     | <i>36B4</i>                    | TCCAGGCTTTGGGCATCA             | CTTTATTCAGCTGCACATCACTCAGA |
| 25     | HPRT                           | CTACGAATCTCCGACCACACTAC        | GGCTTATCATCTTTCAACACGCAG   |
| 26     | $\beta$ -actin                 | TCATCACTATTGGCAACGAGCG         | CGGATGTCAACGTCACACTTCA     |
| 27     | <i>Fgfr1</i>                   | CAACCGTGTGACCAAAGTGG           | TCCGACAGGTCTTCTCCG         |
| 28     | <i>Fgfr4</i>                   | CTCGGAAAGCCCCTGGGTGA           | AGCTTCATCACCTCCATCTCG      |
| 29     | <i>Shp</i>                     | TCTGGAGCCTTGAGCTGGGT           | GCCTTGGCTGGCTGGGTAC        |
| 30     | <i>Hnf4<math>\alpha</math></i> | CAAGAGCTCCATGGTGTTTAAGG        | GTGCCGAGGGACGATGTAGT       |
| 31     | <i>Cyp7a1</i>                  | AGCAACTAAACAACCTGCCAGTAC<br>TA | GTCCGGATATTCAAGGATGCA      |
| 32     | <i>Cyp8b1</i>                  | TAGCCCTGTTAGAGTGTGTGTGAC       | AGTCAGGATCTCTCCCTGAACTTG   |
| 33     | <i>Cyp27a1</i>                 | GCCTTGACAAAGGAAGTACT           | CGCAGGGTCTCCTTAATCACA      |
| 34     | <i>Cyp7b1</i>                  | GAAAACCTTTCAAAGGCAACATGG       | ACTGGAAAGGGTTCAGAACAAATG   |
| 35     | <i>Slc10a1</i>                 | ATCTGACCAGCATTGAGGCTCT         | CCGTCGTAGATTCTTGCTGT       |
| 36     | <i>Slco1a1</i>                 | ACTCCATAATGCCCTTGG             | TAATCGGGCCAACAATCTTC       |
| 37     | <i>Slco1b2</i>                 | ACCAAACCTCAGCATCCAAGC          | TAGCTGAATGAGAGGGCTGC       |
| 38     | <i>Abcb11</i>                  | ACTAATGTTGGGATCCAGGGC          | GGCTTTGTCCAGAGCAAGCTG      |

|                                       |                               |                                     |                                   |
|---------------------------------------|-------------------------------|-------------------------------------|-----------------------------------|
| 39                                    | <i>Abcc2</i>                  | AGCAGGTGTTTCGTTGTGTGT               | AGCCAAGTGCATAGGTAGAGAAT           |
| 40                                    | <i>Abcc1</i>                  | GATGGCTCCGATCCACTCT                 | AGGTAGAAACAAGGCACCCA              |
| 41                                    | <i>Abcc4</i>                  | GCCACATCCTCATACTCAA                 | CTCTGCTTCCTCGTTTTCT               |
| 42                                    | <i>Abcc5</i>                  | GCCCTGGGTACAGAAGTGAC                | TCTTGGCATTCCAACGATCT              |
| 43                                    | <i>Fxr</i>                    | TGTGAGGGCTGCAAAGGTT                 | ACATCCCCATCTTGGAC                 |
| 44                                    | <i>Fgf15</i>                  | CCAACTGCTTCCTCCGAATCC               | TACAGTCTTCCTCCGAGTAGC             |
| 45                                    | <i>Asbt</i>                   | GGAAGTGGCTCCAATATCTG                | TCCAATCACAGCTATGAGCAC             |
| 47                                    | <i>Ost<math>\alpha</math></i> | GCCAGGCAGGACTCATATCAA               | GGCAACTGAGCCAGTGGTAAGA            |
| 48                                    | <i>Ost<math>\beta</math></i>  | GACAAGCATGTTCTCCTGAG                | GATGCAGGTCTTCTGGTGTTC             |
| <b>Bacteria quantification primer</b> |                               |                                     |                                   |
| 49                                    | 16S rRNA                      | 8F: AGAGTTTGATCCTGGCTCAG            | 338R:CTGCTGCCTCCCGTAGGAGT         |
| 50                                    | $\gamma$ Proteobacteria       | 1080 $\gamma$ F: TCGTCAGCTCGTGTGTGA | $\gamma$ 1202 R: CGTAAGGGCCATGATG |
